# Supplementary material for: Actin and microtubule crosslinkers tune mobility and control co-localization in a composite cytoskeletal network
Source: Royal Society of Chemistry journal article supplement (doi:10.1039/c9sm02400j), 2020-01-01
Supplement: c9sm02400j3.pdf [file c9sm02400j3.pdf]

**Electronic Supplementary Information for Soft Matter manuscript:**

**Actin and microtubule crosslinkers tune mobility and control co-localization in a composite cytoskeletal network**

Leila Farhadi<sup>a</sup>, Shea N. Ricketts<sup>b</sup>, Michael J. Rust<sup>c</sup>, Moumita Das<sup>d</sup>, Rae M. Robertson-Anderson<sup>b</sup>, and Jennifer L. Ross<sup>\*a</sup>

<sup>a</sup>Department of Physics, University of Massachusetts, Amherst, 666 N. Pleasant St., Amherst, MA 01003

<sup>b</sup>Department of Physics and Biophysics, University of San Diego, 5998 Alcalá Park, San Diego, CA 92110

<sup>c</sup>Department of Molecular Genetics and Cell Biology, University of Chicago, University of Chicago, 900 E 57th St, Chicago, IL 60637

<sup>d</sup>School of Physics and Astronomy, Rochester Institute of Technology, 84 Lomb Memorial Drive, Rochester, NY 14623

[\\*rossj@physics.umass.edu](mailto:*rossj@physics.umass.edu)

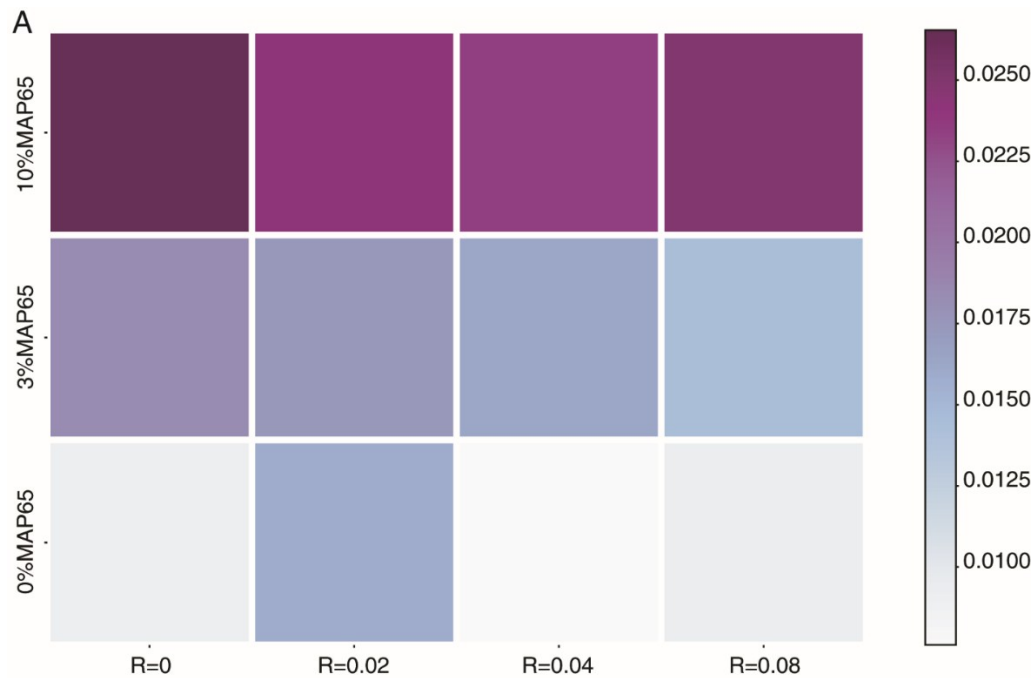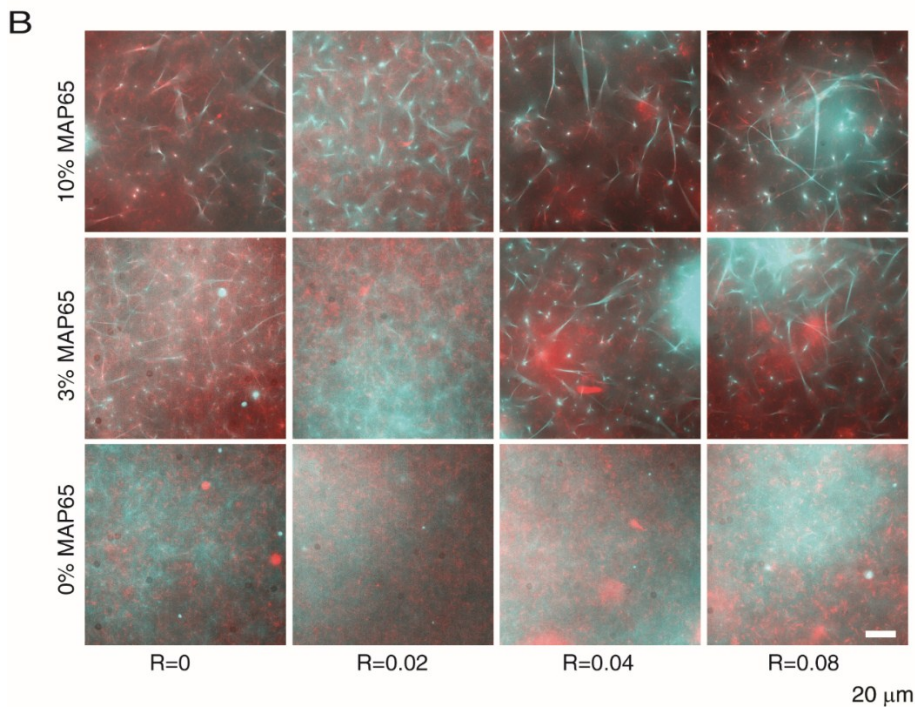

**Supplemental Figure S1. Cross-correlation between actin and microtubule channels.** (A) Heat map plot shows the mean of normalized cross-correlation values for all composite networks measured with various  $R$  and MAP65 percent bound. Color scale indicates quantitative cross-correlation. (B) Representative merged images of microtubule (cyan) and actin (red) for all experimental parameters with various  $R$  and MAP65 percent bound. Scale bar is  $20 \mu\text{m}$ . ( $N = 8 - 10$  independent measurements)

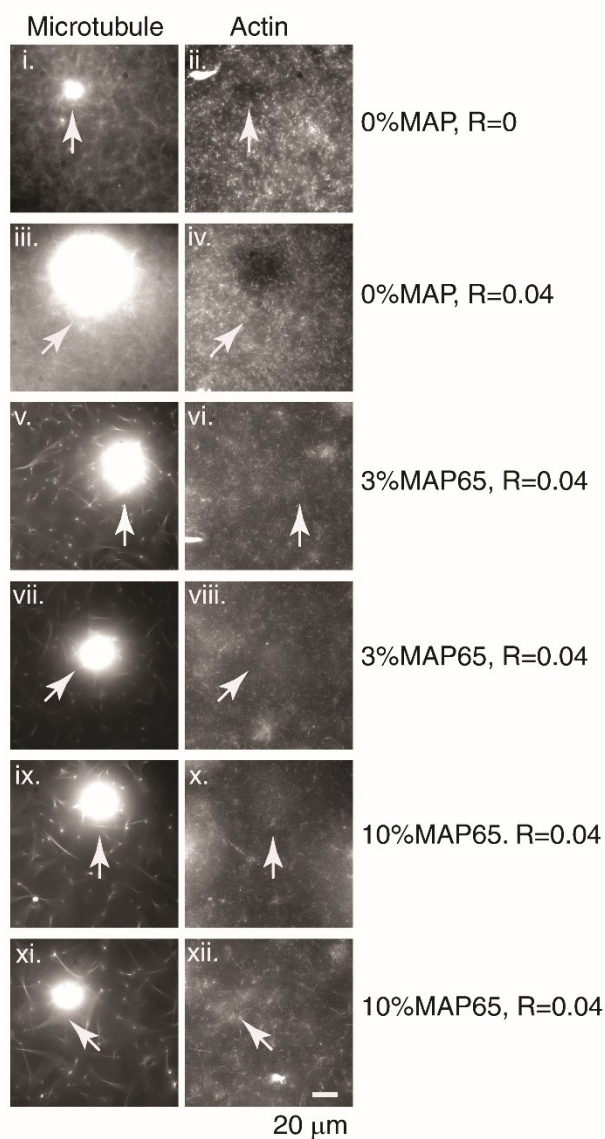

**Supplemental Figure S2.** High intensity microtubule aggregates do not appear in the actin channels. Representative images of microtubules (i, iii, v, vii, ix, xi) and actin (ii, iv, vi, viii, x, xii) for the same region in the experimental chamber at different percentages of MAP65 and  $R$ . Arrows denote regions where there is high fluorescence in the microtubule channel, which are caused by aggregates, without bleed-through into the actin channel. Scale bar is 20  $\mu$ m.

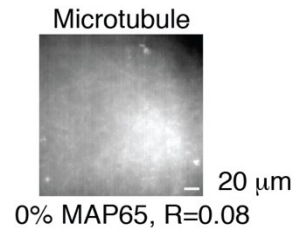

**Supplemental Figure S3. Microtubules in the presence of actin crosslinkers.** Representative image of microtubules in the presence of actin crosslinkers, NeutrAvidin, at  $R = 0.08$  does not show any structure or any evidence of crosslinking. Scale bar is 20  $\mu\text{m}$ .
